# Supplementary material
Source: publisher figshare collection journal article supplement (https://karger.figshare.com/articles/dataset/_/5126071)
Supplement: Supplementary file 1 [file 1]

**Supplementary Table 1** Three TM9SF3-small interfering RNAs for transient knockdown

| Three independent oligonucleotides of TM9SF3 (*all in sense strand) |                                         |
|---------------------------------------------------------------------|-----------------------------------------|
| TM9SF3-siRNA1                                                       | 5'-UCU UCC UCU AAA UCU UGU UGG UAC A-3' |
| TM9SF3-siRNA2                                                       | 5'-GCU GCA UCA ACU GCA AUC UAU GUU U-3' |
| TM9SF3-siRNA3                                                       | 5'-CAG CCA CUU ACU GUG AAA UUG AUU U-3' |

**Pathobiology :** Supplementary material

**Manuscript Title:**

Identification of novel transmembrane proteins in scirrhous type gastric cancer by  
*Escherichia coli* ampicillin secretion trap (CAST) method: *TM9SF3* participates in tumor  
invasion and serves as a prognostic factor

**Author:**

Htoo Zarni Oo,<sup>1</sup> Kazuhiro Sentani,<sup>1</sup> Naoya Sakamoto,<sup>1</sup> Katsuhiro Anami,<sup>1</sup> Yutaka Naito,<sup>1</sup>  
Takashi Oshima,<sup>2</sup> Kazuyoshi Yanagihara,<sup>3</sup> Naohide Oue,<sup>1</sup> Wataru Yasui<sup>1</sup>
