# Supplementary material
Source: publisher figshare collection journal article supplement (https://karger.figshare.com/articles/dataset/_/5126071)
Supplement: Supplementary file 2 [file 1 › 000357821_sm_Figure.pdf]

## Supplementary Figure 1

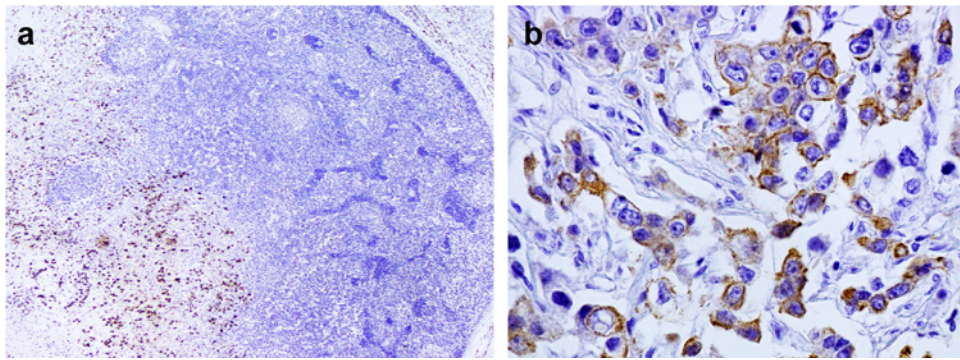

**Supplementary Fig. 1. (a and b)** Expression of TM9SF3 in corresponding metastatic lymph nodes.
